# Supplementary material for: Analyzing handwriting legibility through hand kinematics
Source: Frontiers journal article supplement (doi:10.3389/frai.2025.1426455), 2025-03-26
Supplement: Data_Sheet_1.pdf [file Data_Sheet_1.pdf]

## Supplementary Material

في الغابة حيوانات كثيرة بنسور صناع تعال  
 صباء صوا فطيم لقاق سلاحف عزلان بجم  
 ديبوب هداهد خنازير بنات آوا قناقد  
 عصافير صائم خنافس بعوض و فراشات

### Word-level assessment

*In the handwriting sample, please mark and count the following errors:*

#### Spelling:

#### Letter formation:

#### Letter missing parts (hamza, tooth, etc.):

#### Dots:

### Holistic assessment

*In the following questions please consider your overall assessment of the writing:*

**Readability** - How easy/difficult is it to read this person's handwriting?

☐ Hard to read      ☐ Normal      ☐ Easy to read

**Space management** - Was this person able to fit their writing in the space available?

☐ Not efficient      ☐ Acceptable      ☐ Efficient

**Style consistency** - How consistent was this person in following specific style (رقعة or نسخ or mix)?

☐ Not consistent      ☐ Mixing      ☐ Consistent

**Aesthetics** - How beautiful is the handwriting of this person?

☐ Not beautiful      ☐ Normal      ☐ Beautiful

Rate the overall legibility of this handwriting:      ☐ Legible      ☐ Illegible

**Figure S1.** Sample of the online paper-based survey filled by the experts. In the paper-based survey the experts were asked to perform the word-level assessment and evaluate their overall impression of the legibility of the given handwritten sample.

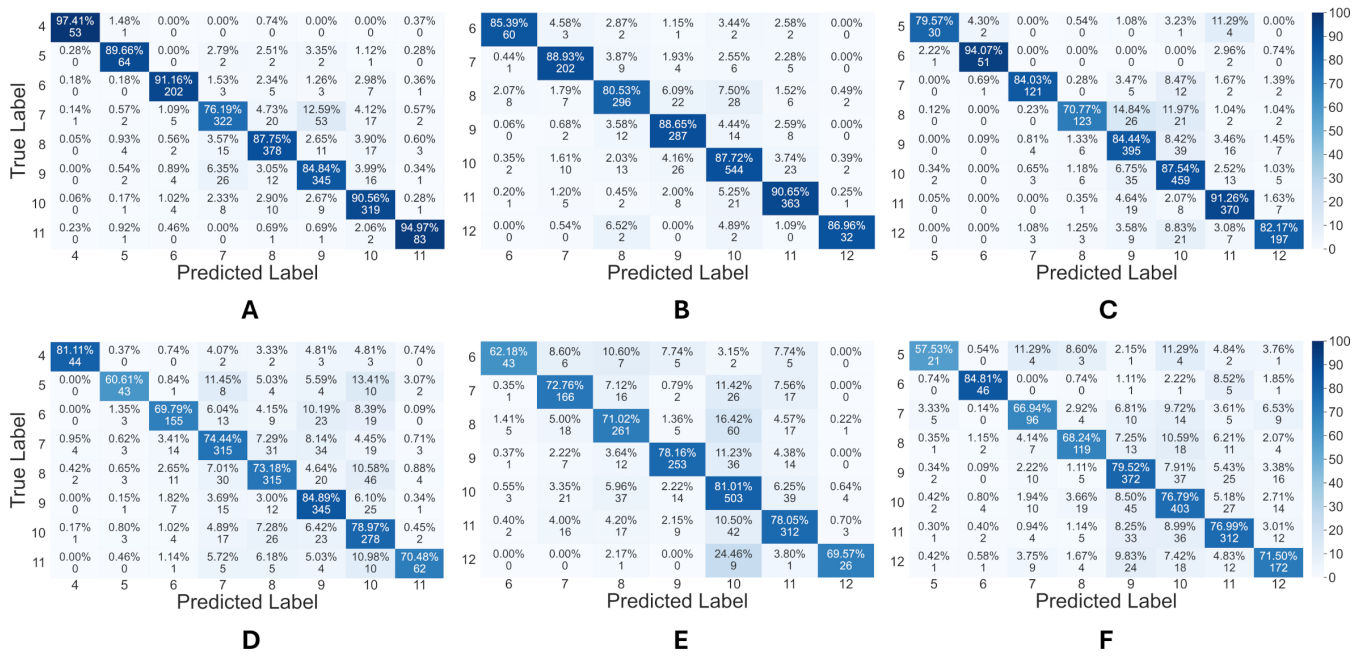

**Figure S2.** Confusion matrices for each expert averaged across 5 folds, upper row – model using stylus and hand kinematics features: (A) expert 1, (B) expert 2, (C) expert 3, lower row – model using stylus kinematic features only: (D) expert 1, (E) expert 2, (F) expert 3.
